# Supplementary material
Source: PubMed Central journal article supplement (PMC1636090)
Supplement: rspb20063592s09.pdf [file rspb20063592s09.pdf]

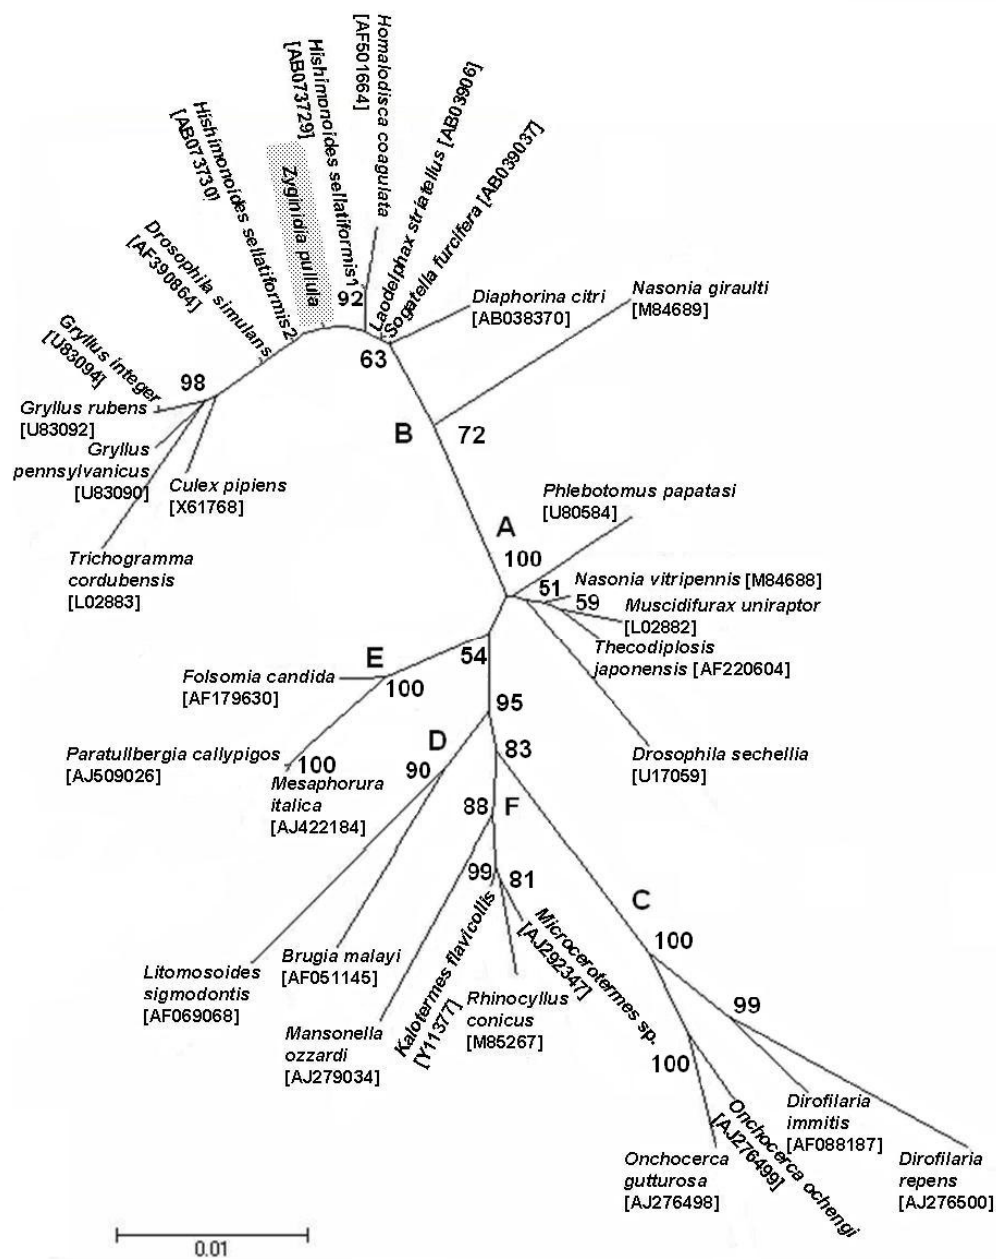

Figure S1.

Figure caption

Figure S1. Unrooted phylogenetic tree of *Wolbachia* endosymbionts of arthropods and filarial nematodes based on 16S rRNA sequences. The name of the host species is followed by GenBank accession numbers [in brackets]. Numbers indicate bootstrap values (1000 replicates); bootstrap values less than 50 are not shown. Bold letters indicate the *Wolbachia* supergroups (A – F).
